# Supplementary material
Source: PubMed Central journal article supplement (PMC6126385)
Supplement: 135957_2_supp_153169_pc813d.pdf [file 135957_2_supp_153169_pc813d.pdf]

## **Supplemental information**

### **Glycomic and Proteomic changes in aging brain nigrostriatal pathway**

Rekha Raghunathan<sup>1</sup>, Nicole K. Polinski<sup>4</sup>, Joshua A. Klein<sup>3</sup>, John. D Hogan<sup>3</sup>, Chun Shao<sup>1</sup>, Kshitij Khatri<sup>1</sup>, Deborah Leon<sup>1</sup>, Mark McComb<sup>1</sup>, Caryl E. Sortwell<sup>4\*</sup>, Joseph Zaia<sup>1, 2, 3\*</sup>

<sup>1</sup>Department of Molecular and Translational Medicine, Center for Biomedical Mass Spectrometry, Boston University Medical Campus

<sup>2</sup>Dept. of Biochemistry, Center for Biomedical Mass Spectrometry, Boston University Medical Campus

<sup>3</sup>Bioinformatics Program, Boston University

<sup>4</sup>Dept. of Translational Science and Molecular Medicine, Michigan State University

**Supplemental Figures:**

Figure S1: Optical images of rat brain tissue slides with the regions digested on slides with striatum marked in pink or black.

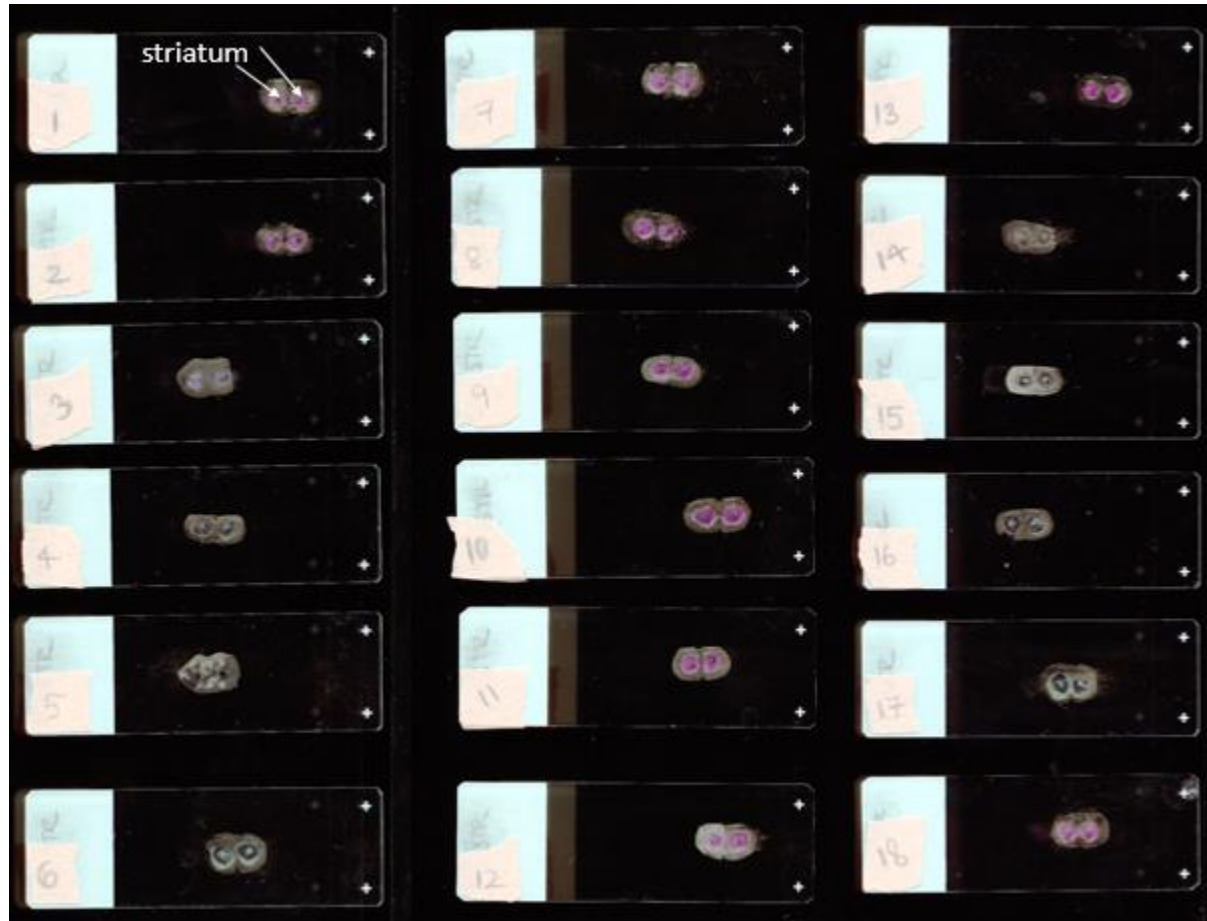

Figure S1 (continued)

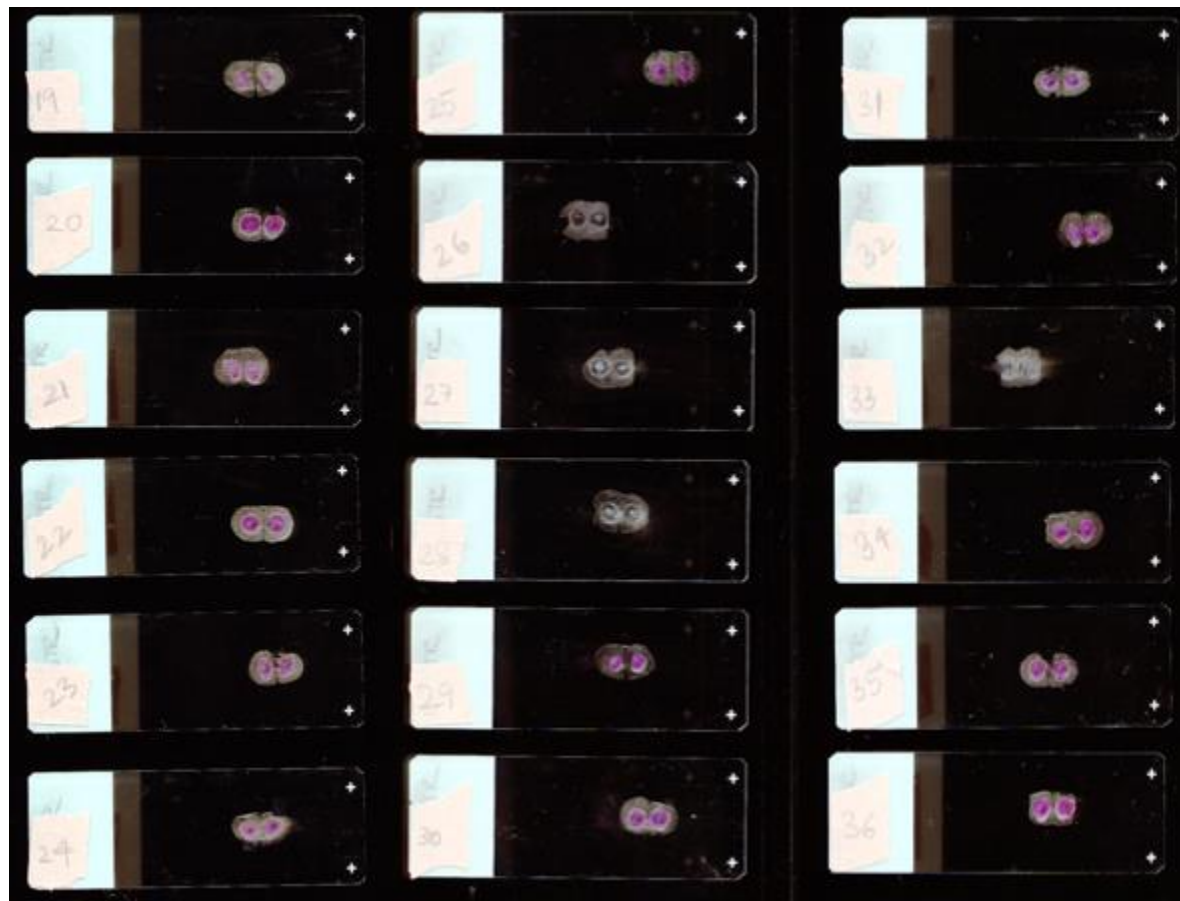

Figure S2: Optical images of rat brain tissue slides with the regions digested on slides with substantia nigra marked in pink or black.

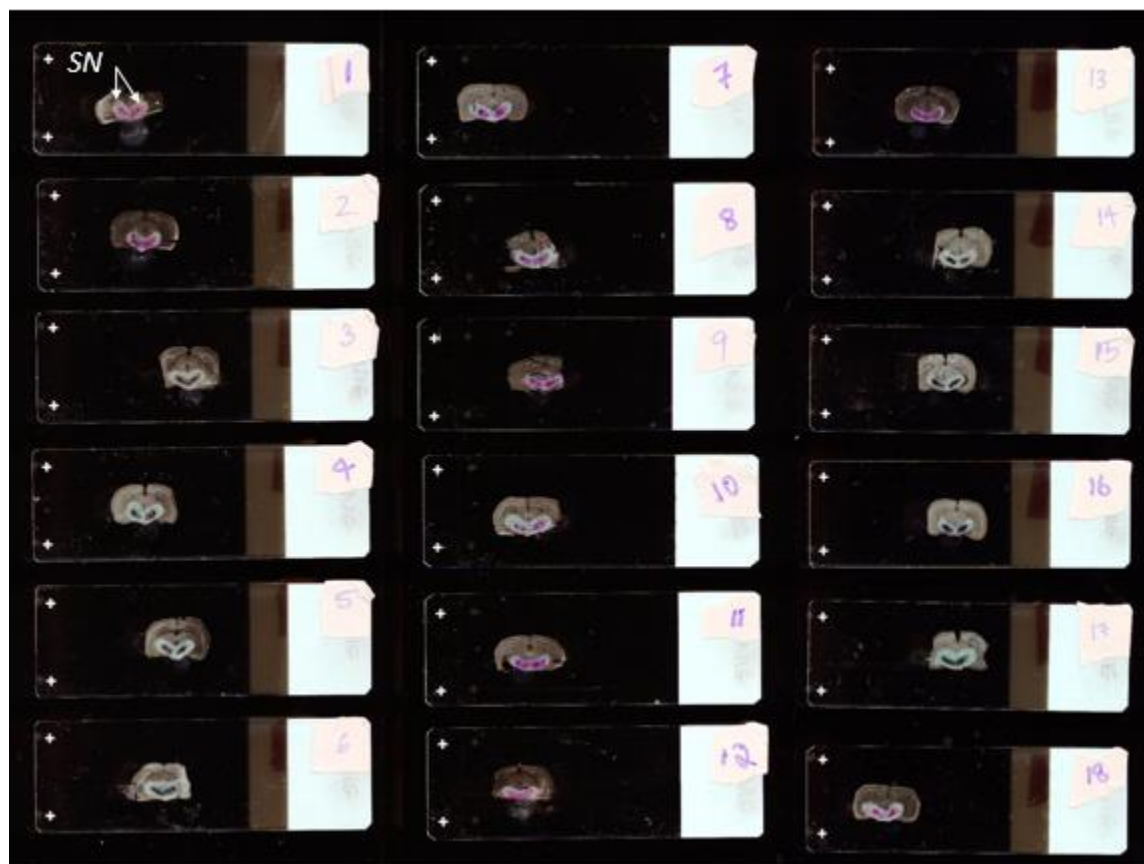

Figure S2 (continued)

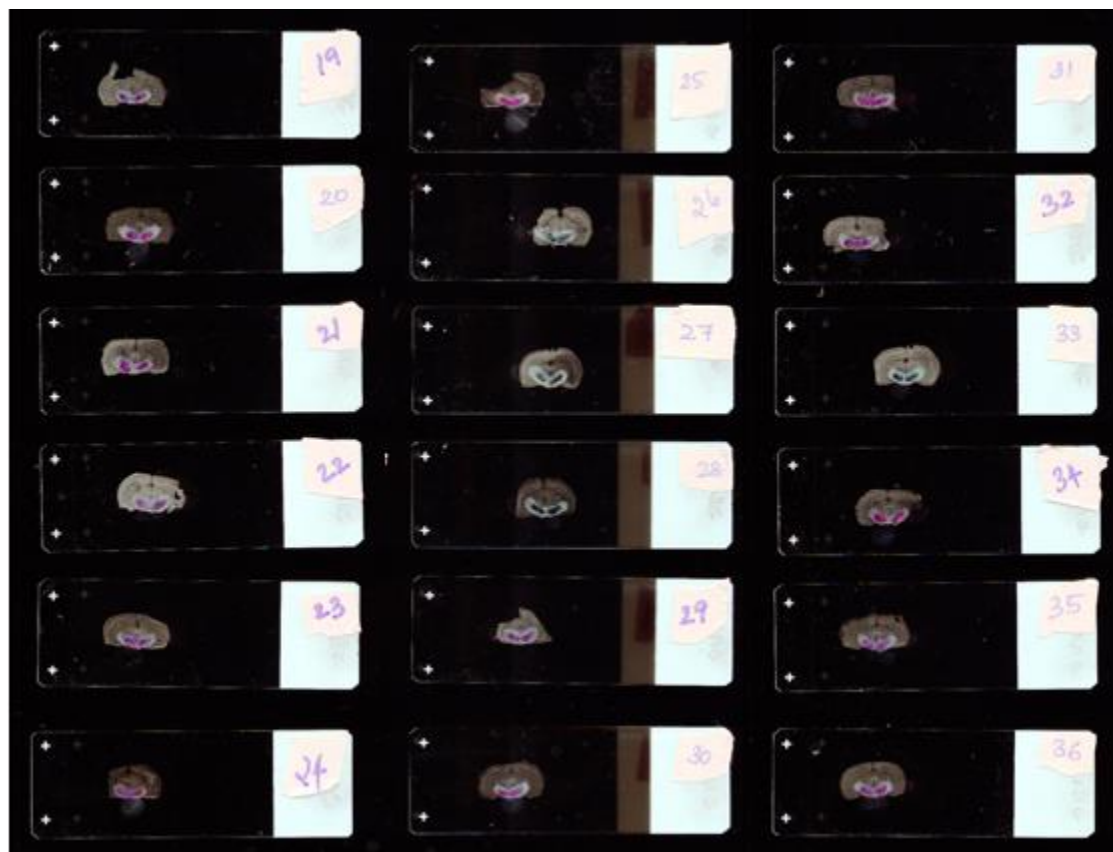

Figure S3: Representative LC/MS EIC profiles of HS disaccharides comparing one young versus aged striatum. The disaccharide codes are shown.

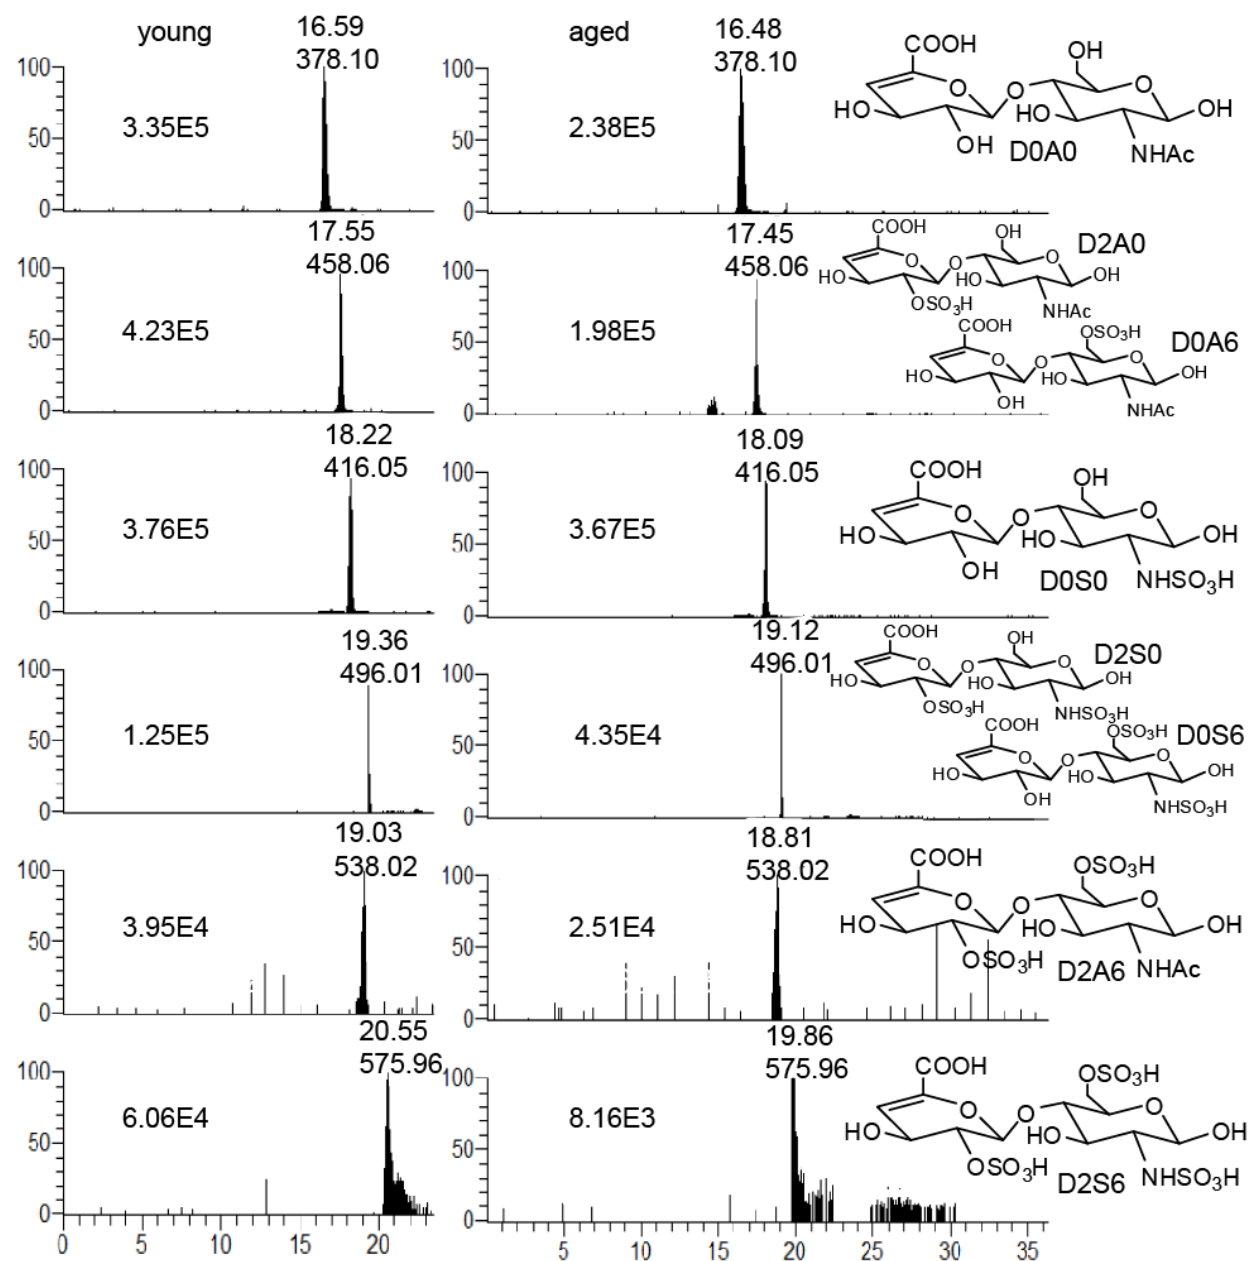

Figure S4: Proteomics quality assessment of instrument performance over the striatum cohort.

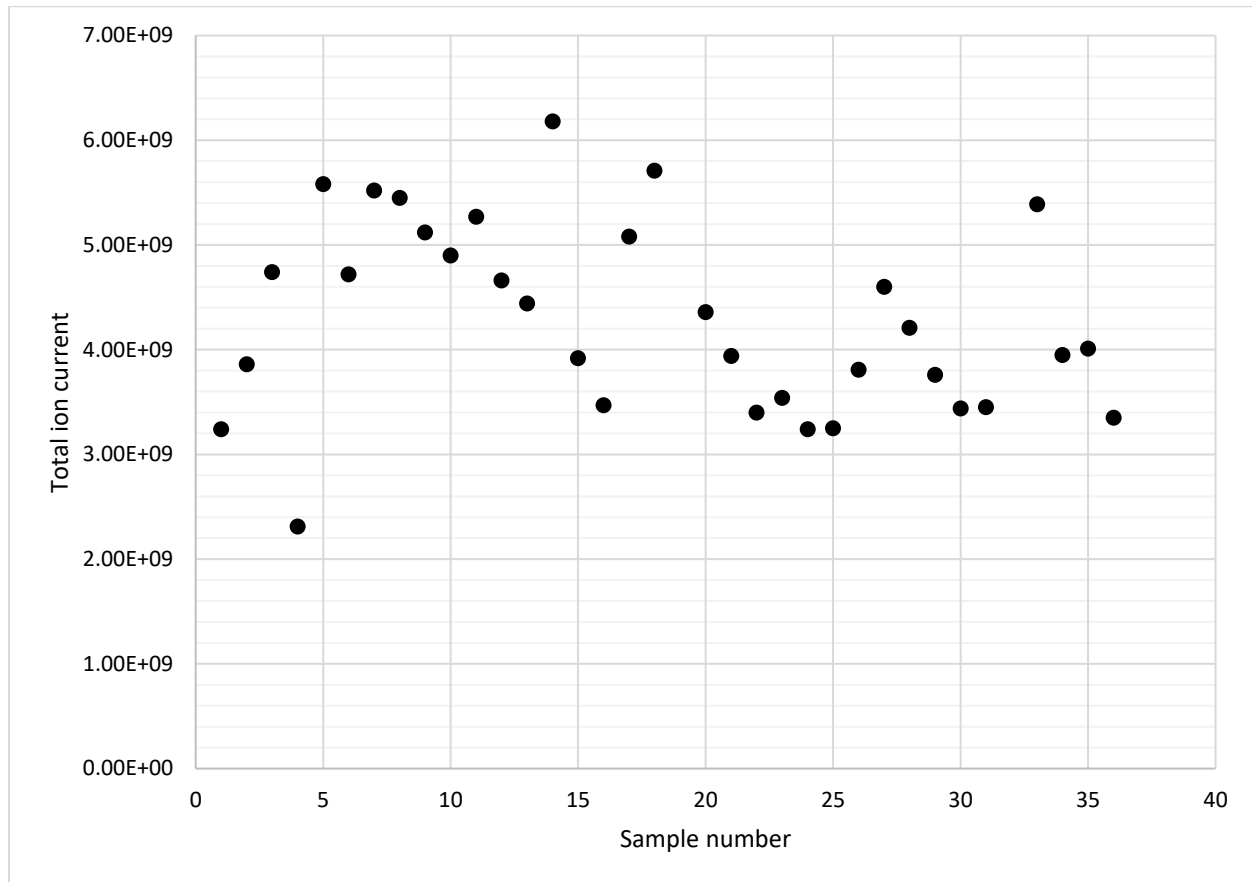

We observe the total ion chromatogram of all samples are within a 2.6 fold difference for all peptides released from the striatum of rats. We had two files, Rat19 and Rat 32 that we were unable to analyze due to computer disk error.

Figure S5: Proteomics quality Assessment of Instrument performance over the substantia nigra cohort.

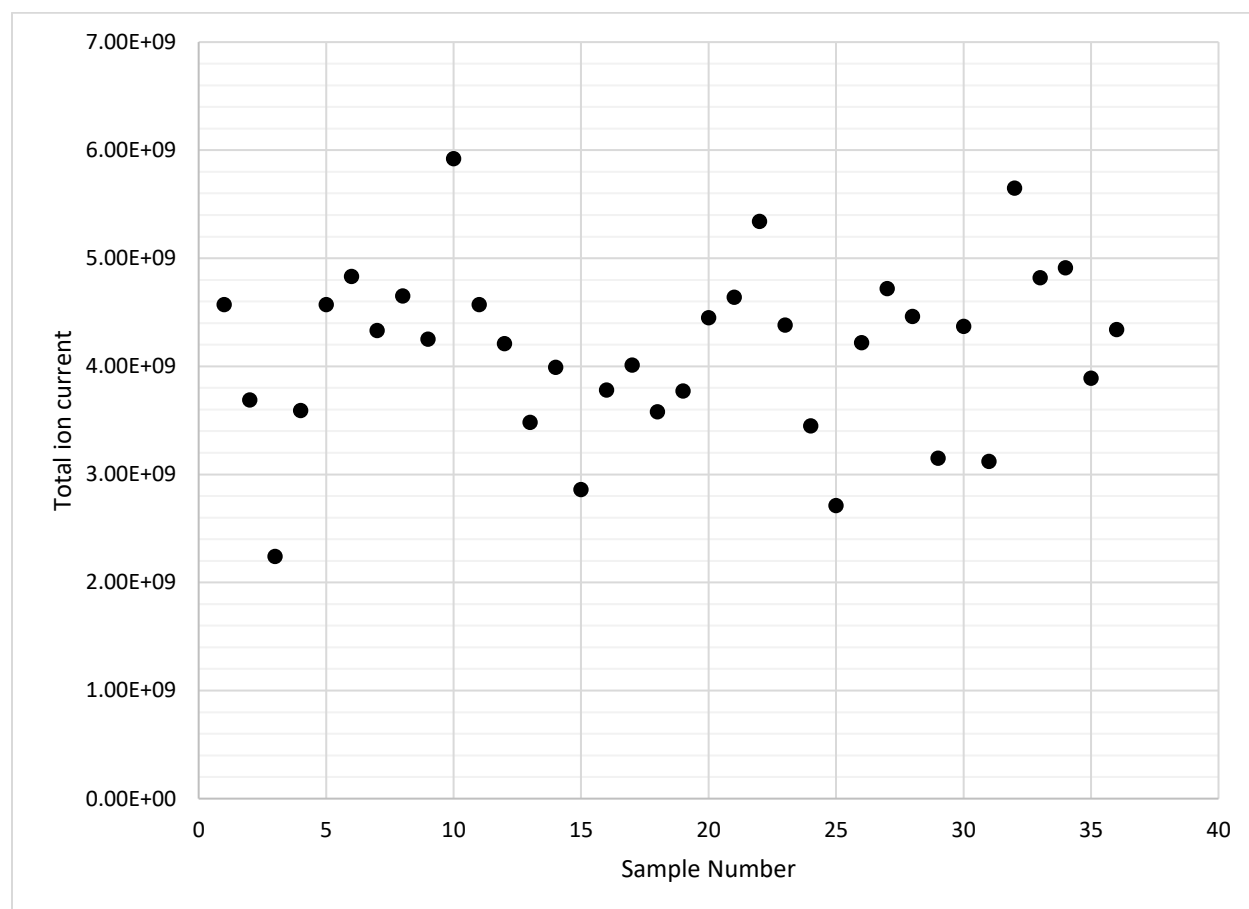

We observed the total ion current of all samples are within a 2.6 fold difference for all peptides released from the substantia nigra of rats

Figure S6: Peptide distribution of the data

a. Distribution of Peaks peptide score for striatum samples

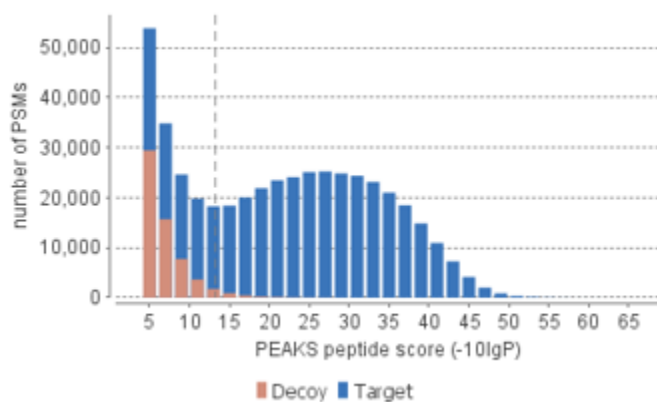

b. Scatter plot of PEAKS peptide score versus precursor mass error

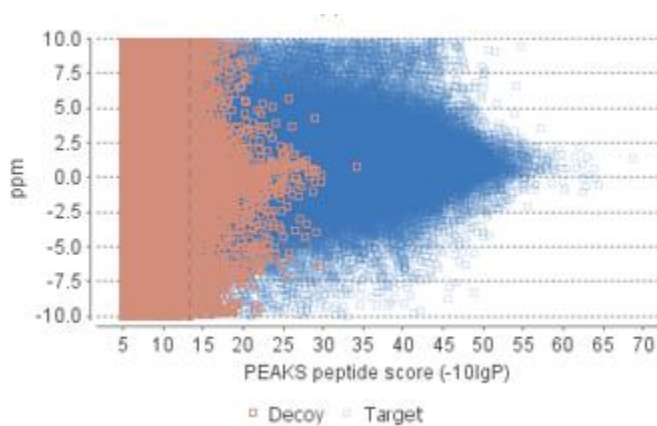

c. Distribution of Peaks peptide score for the substantia-nigra samples

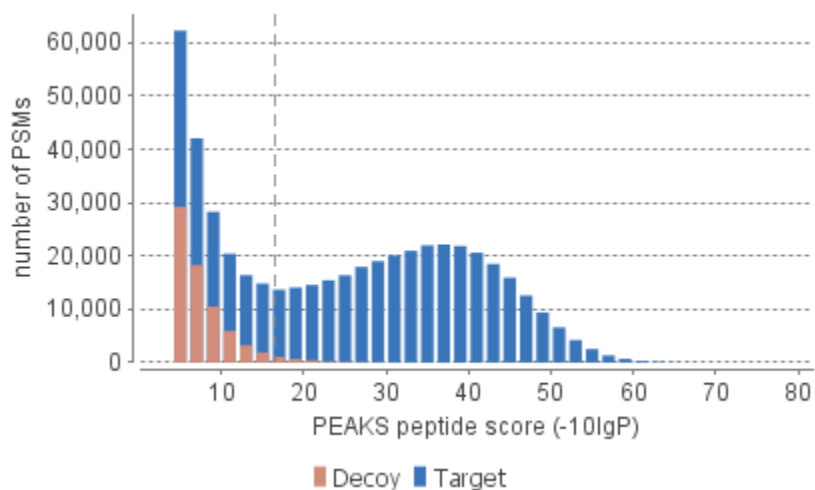

d. Scatter plot of PEAKS peptide score versus precursor mass error

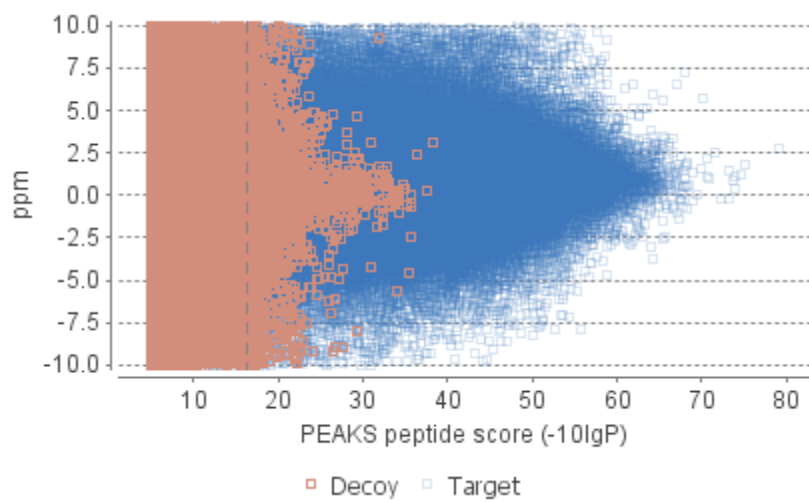

Figure S7: Gene Ontology analysis of aging rat striatum

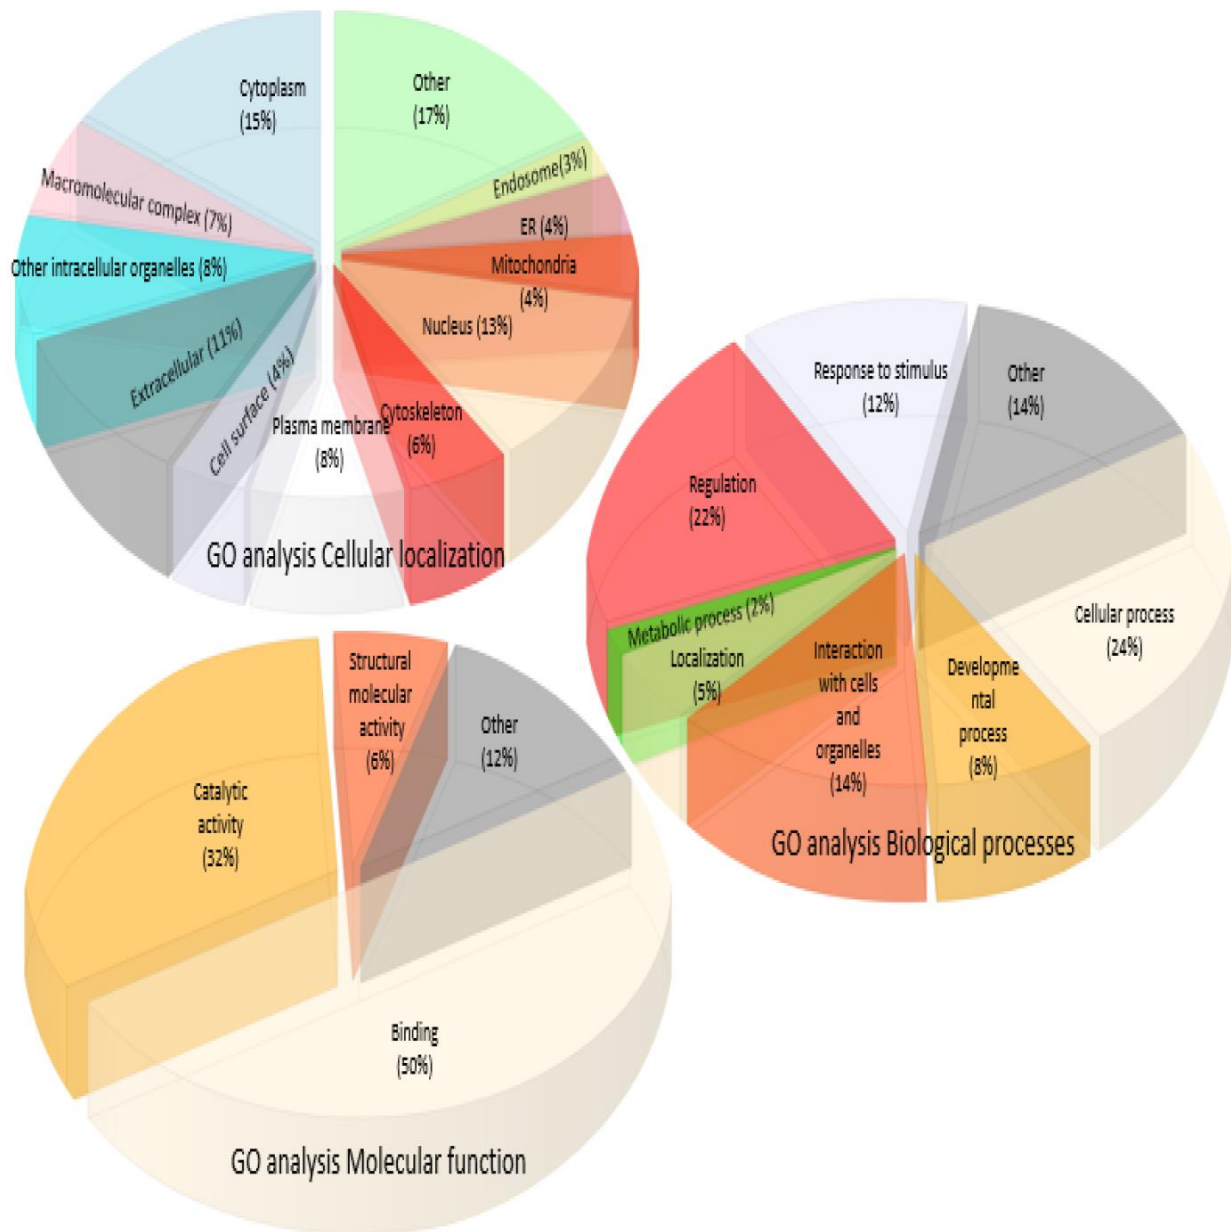

A. GO analysis based on cellular localization: The proteins identified by Peaks are assessed for overall changes in cellular processes. It was found that proteins from the striatum have 11% ECM related and 8% plasma membrane related cellular localization.

B. GO analysis based on Biological processes: Based on the biological processes, the proteins identified from the striatum, majority of proteins, 24% represent cellular processes, followed by 22% being involved in regulation. Loss of regulation of certain processes like protein folding, cell sorting and protein degradation are characteristic of Parkinson's disease.

C. GO analysis based on Molecular function: The majority of the proteins classified into binding as the molecular process in the striatum, with 50% GO score.

Figure S8: Gene ontology analysis of aging rat substantia nigra

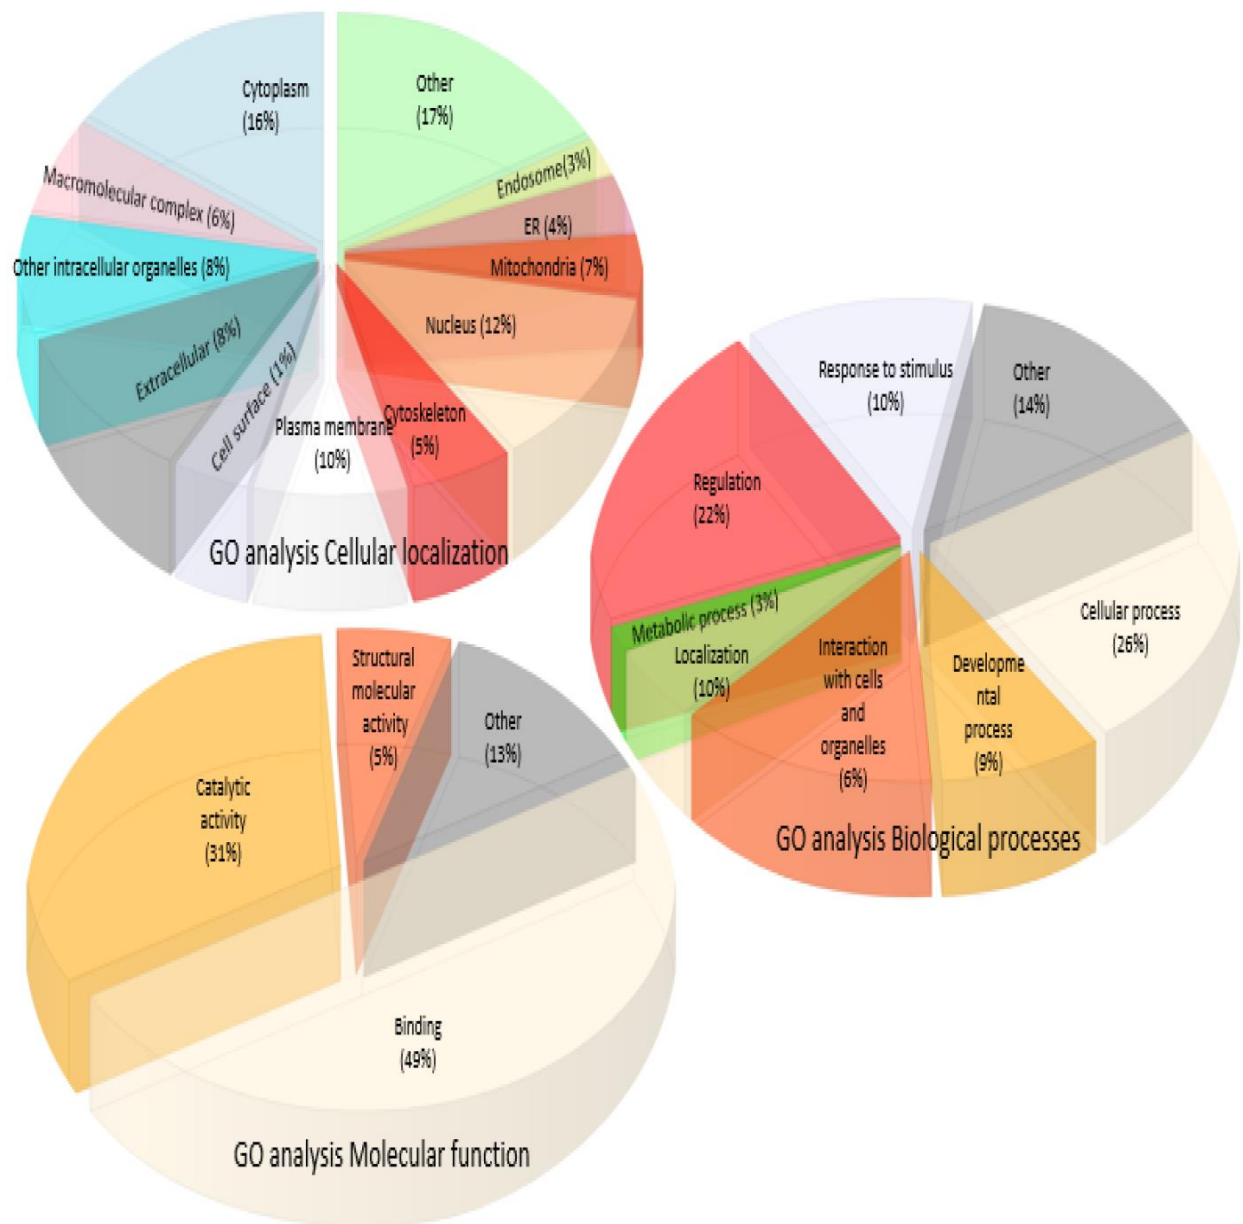

A. GO analysis based on Cellular Process: The proteins identified by Peaks were assessed for overall changes in cellular processes. It was found that proteins from the substantia nigra have 8% ECM related and 10% from the plasma membrane.

- B. GO analysis based on Biological process: Based on the biological processes, the proteins identified from the substantia nigra, 26% represent cellular processes.
- C. GO analysis based on Molecular function: The majority of the proteins classified into binding as the molecular process in the substantia nigra.

Figure S9: HS disaccharide absolute abundance (fmol) in striatum (A) and substantia-nigra (B)

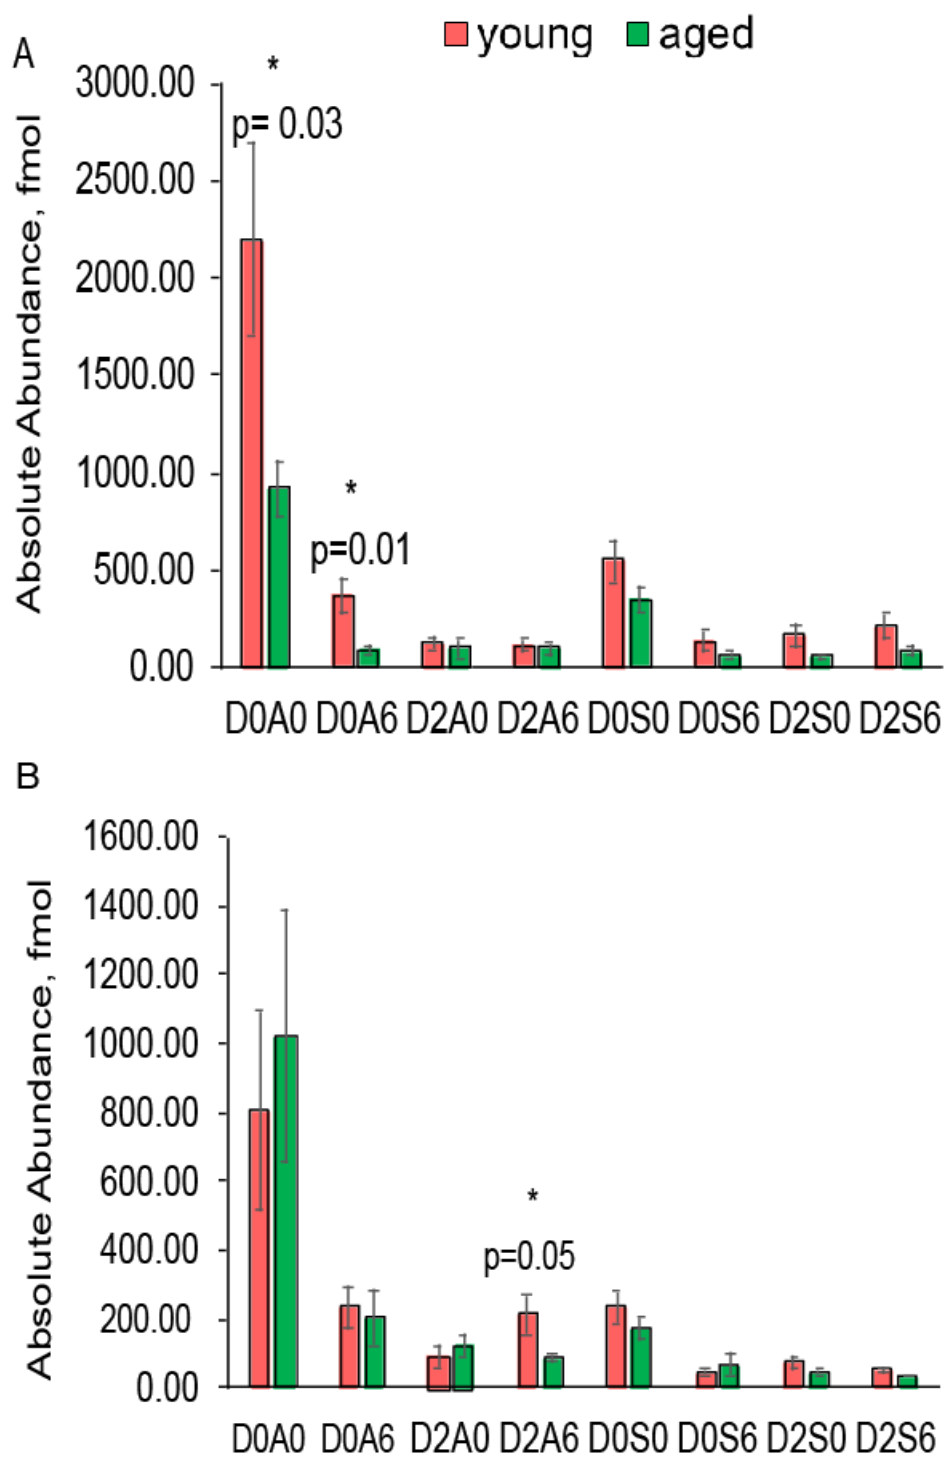

Figure S10: HS disaccharide relative abundance of saturated disaccharides in striatum (A) and chain length of HS in young versus aged striatum (B). Relative abundance of saturated disaccharides in substantia-nigra (C) chain length of HS in young versus aged substantia-nigra (D). The disaccharide codes are similar to those shown in Figure S3 except that U signifies unsaturated hexuronic acid.

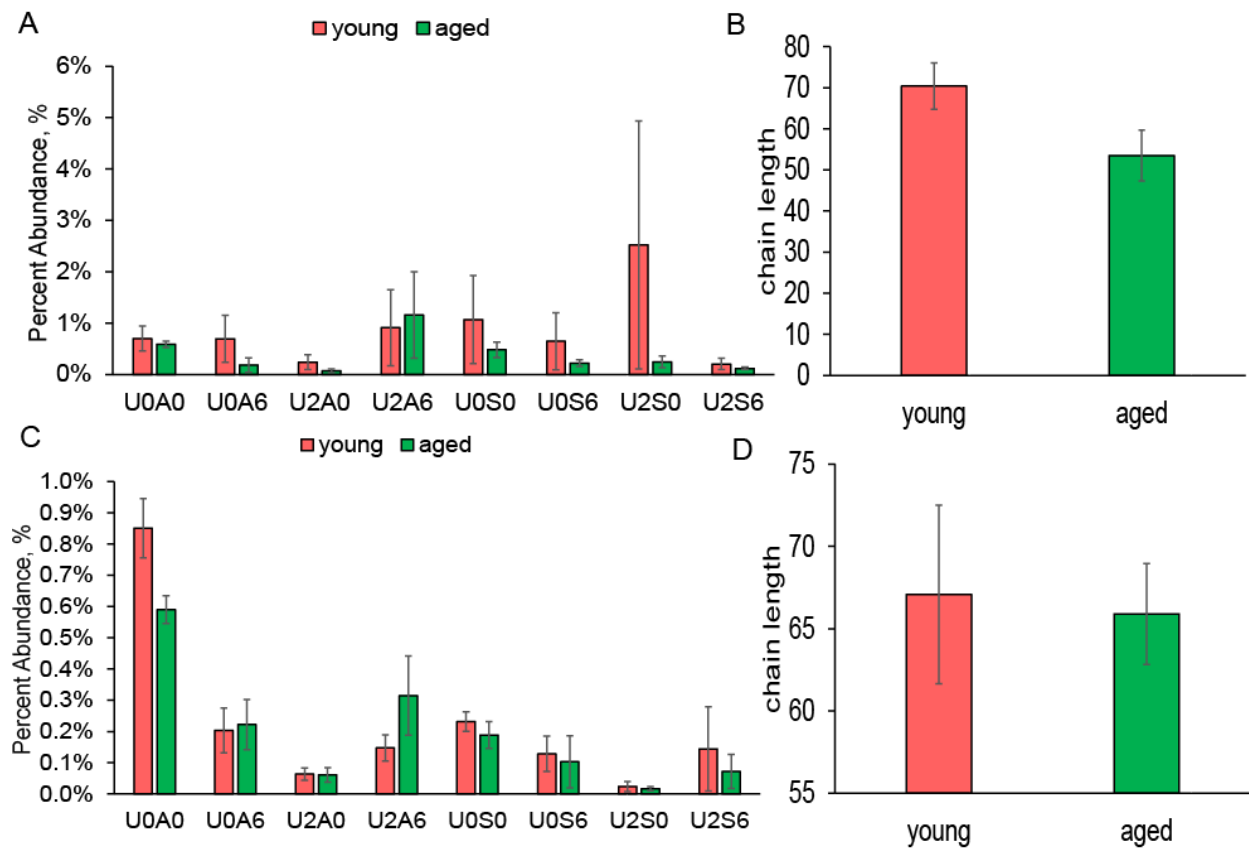

## TABLES:

Table S1: Experimental method with enzymatic digestions represented

| Enzyme                                 | Concentration                                                                                                                                          | Reaction mixture                                                                                                                                                                                                       | cycles                                   | Reaction/<br>Extraction<br>volume | Extraction<br>buffer            |
|----------------------------------------|--------------------------------------------------------------------------------------------------------------------------------------------------------|------------------------------------------------------------------------------------------------------------------------------------------------------------------------------------------------------------------------|------------------------------------------|-----------------------------------|---------------------------------|
| Hyaluronidase                          | 20milliU/ $\mu$ L                                                                                                                                      | 10 $\mu$ L enzyme +<br>30 $\mu$ L 5mM ammonium<br>acetate                                                                                                                                                              | 5X 37°C<br>(4X 1hr &<br>1X<br>overnight) | 1.8 $\mu$ L/spot                  | 0.3%<br>Ammonium<br>hydroxide   |
| Chondroitinas<br>e ABC                 | 2 milliU/ $\mu$ L                                                                                                                                      | 10 $\mu$ L enzyme+<br>0.5 $\mu$ L 100mM<br>Ammonium acetate<br>2.5 $\mu$ L 100mM Tris-HCl<br>27 $\mu$ L Water                                                                                                          | 5X 37°C<br>(4X 1hr &<br>1X<br>overnight) | 1.8 $\mu$ L/spot                  | 0.3%<br>Ammonium<br>hydroxide   |
| Heparan<br>sulfate Lyase<br>+ PNGase F | HS Lyase I =<br>0.97 milliU/ $\mu$ L<br>HS Lyase<br>II=1.17<br>milliU/ $\mu$ L<br>HS Lyase<br>III=2.28<br>milliU/ $\mu$ L<br>PNGase F=<br>100,000 U/mL | I=10 $\mu$ L<br>II=10 $\mu$ L<br>III=10 $\mu$ L<br>PNGaseF=10 $\mu$ L<br>6.4 $\mu$ L 5mM Ammonium<br>bicarbonate<br>3 $\mu$ L 100mM<br>Ammonium acetate<br>0.62 $\mu$ L 100mM<br>Calcium Chloride<br>6.4 $\mu$ L Water | 5X 37°C<br>(4X 1hr &<br>1X<br>overnight) | 1.8 $\mu$ L/spot                  | 0.3%<br>Ammonium<br>hydroxide   |
| Trypsin                                | 1 $\mu$ g/ $\mu$ L                                                                                                                                     | 5 $\mu$ L enzyme + 25 $\mu$ L<br>15mM Ammonium<br>bicarbonate                                                                                                                                                          | 5X 37°C<br>(4X 1hr &<br>1X<br>overnight) | 1.8 $\mu$ L/spot                  | 30%<br>Acetonitrile<br>0.1% TFA |

Table S2A: Order of run to for SEC, HS-glycomics and N-glycan glycomics and proteomics are indicated randomized and blinded in striatum

| SEC     | LC-MS-HS    | LC-MS-NL    | LC-MS-proteomics |
|---------|-------------|-------------|------------------|
| Rat21   | Rat1        | Rat3        | Rat1             |
| Rat7    | Rat2        | Rat4        | Rat2             |
| Rat18   | Rat3        | Rat5        | Rat3             |
| Rat21   | Rat2-rerun  | Rat6        | Rat4             |
| Rat13   | Rat6        | Rat7        | Rat5             |
| Rat25   | Rat8        | Rat8        | Rat6             |
| Rat3    | Rat9        | Rat9        | Rat7             |
| Rat4    | Rat4        | Rat10       | Rat8             |
| Rat5    | Rat5        | Rat11       | Rat9             |
| Rat6    | Rat7        | Rat12       | Rat10            |
| Rat8    | Rat10       | Rat13       | Rat11            |
| Rat9    | Rat11       | Rat14       | Rat12            |
| Rat10   | Rat12       | Rat15       | Rat13            |
| Rat11   | Rat13       | Rat16       | Rat14            |
| Rat12   | Rat14       | Rat17       | Rat15            |
| Rat13   | Rat15       | Rat18       | Rat16            |
| Rat14   | Rat16       | Rat19       | Rat17            |
| Rat15   | Rat17       | Rat20       | Rat18            |
| Rat16   | Rat18       | Rat21       | Rat19            |
| Rat17   | Rat19       | Rat22       | Rat20            |
| Rat19   | Rat20       | Rat23       | Rat21            |
| Rat20   | Rat20-rerun | Rat24       | Rat22            |
| Rat22   | Rat21       | Rat25       | Rat23            |
| Rat23   | Rat22       | Rat25-rerun | Rat24            |
| Rat26   | Rat23       | Rat1        | Rat25            |
| Rat27   | Rat24       | Rat2-rerun  | Rat26            |
| Rat28   | Rat24-rerun | Rat16-rerun | Rat27            |
| Rat29   | Rat25       | Rat23-rerun | Rat28            |
| Rat30   | Rat26       | Rat25-rerun | Rat29            |
| Rat31   | Rat27       | Rat26       | Rat30            |
| Rat32   | Rat28       | Rat27       | Rat31            |
| Rat33   | Rat29       | Rat27-rerun | Rat32            |
| Rat34   | Rat30       | Rat28       | Rat33            |
| Rat35   | Rat31       | Rat29-rerun | Rat34            |
| Rat36   | Rat32       | Rat30       | Rat35            |
| Reclean | Rat33       | Rat31       | Rat36            |
| Rat20   | Rat34       | Rat32       |                  |
| Rat22   | Rat35       | Rat33       |                  |
| Rat29   | Rat36       | Rat34       |                  |
| Rat30   | Rat27-rerun | Rat35       |                  |
| Rat22   | Rat19-rerun | Rat36       |                  |
| Rat26   | Rat21-rerun |             |                  |
|         | Rat22-rerun |             |                  |

|  |             |  |  |
|--|-------------|--|--|
|  | Rat17-rerun |  |  |
|--|-------------|--|--|

Table S2B: Order of run to for SEC, HS-glycomics and N-glycan glycomics and proteomics are indicated randomized and blinded in substantia nigra

| SEC   | LC-MS-HS    | LC-MS-NL    | LC-MS-proteomics |
|-------|-------------|-------------|------------------|
| Rat1  | Rat1        | Rat1        | Rat1             |
| Rat2  | Rat3        | Rat2        | Rat2             |
| Rat3  | Rat4        | Rat3        | Rat3             |
| Rat4  | Rat7        | Rat4        | Rat4             |
| Rat5  | Rat13       | Rat5        | Rat5             |
| Rat6  | Rat14       | Rat6        | Rat6             |
| Rat7  | Rat15       | Rat7        | Rat7             |
| Rat9  | Rat17       | Rat8        | Rat8             |
| Rat10 | Rat21       | Rat9        | Rat9             |
| Rat12 | Rat22       | Rat10       | Rat10            |
| Rat13 | Rat25       | Rat11       | Rat11            |
| Rat14 | Rat28       | Rat12       | Rat12            |
| Rat15 | Rat8        | Rat13       | Rat13            |
| Rat17 | Rat5        | Rat14       | Rat14            |
| Rat11 | Rat9        | Rat15       | Rat15            |
| Rat8  | Rat10       | Rat16       | Rat16            |
| Rat16 | Rat11       | Rat16-rerun | Rat17            |
| Rat18 | Rat12       | Rat17       | Rat18            |
| Rat20 | Rat16       | Rat18       | Rat19            |
| Rat21 | Rat18       | Rat18-rerun | Rat20            |
| Rat22 | Rat20       | Rat19       | Rat21            |
| Rat24 | Rat23       | Rat20       | Rat22            |
| Rat25 | Rat30       | Rat20-rerun | Rat23            |
| Rat26 | Rat31       | Rat21       | Rat24            |
| Rat27 | Rat27       | Rat22       | Rat25            |
| Rat28 | Rat29       | Rat23       | Rat26            |
| Rat29 | Rat32       | Rat24       | Rat27            |
| Rat30 | Rat33       | Rat25       | Rat28            |
| Rat31 | Rat34       | Rat26       | Rat29            |
| Rat32 | Rat35       | Rat27       | Rat30            |
| Rat33 | Rat36       | Rat28       | Rat31            |
| Rat34 | Rat26       | Rat29       | Rat32            |
| Rat35 | Rat19       | Rat30       | Rat33            |
| Rat36 | Rat6        | Rat31       | Rat34            |
| Rat23 | Rat1        | Rat32       | Rat35            |
| Rat35 | Rat2-rerun  | Rat33       | Rat36            |
| Rat8  | Rat8-rerun  | Rat34       |                  |
|       | Rat22-rerun | Rat35       |                  |
|       | Rat24-rerun | Rat36       |                  |
|       |             | Rat16-rerun |                  |
|       |             | Rat18-rerun |                  |
|       |             | Rat20-rerun |                  |

|  |  |             |  |
|--|--|-------------|--|
|  |  | Rat35-rerun |  |
|  |  | Rat36-rerun |  |

Table S3. Six young (Y1-Y6) and six aged (O1-O6) rats were chosen and three serial section were used as technical replicates. Each section was labeled Rat. Samples are randomized and blinded prior to digestion. Following is the table of code for the replicates of each rat.

|       | Animal | replicate1 | replicate2 | replicate3 |
|-------|--------|------------|------------|------------|
| Young | Y1     | Rat1       | Rat12      | Rat24      |
|       | Y2     | Rat2       | Rat13      | Rat25      |
|       | Y3     | Rat3       | Rat14      | Rat26      |
|       | Y4     | Rat15      | Rat4       | Rat16      |
|       | Y5     | Rat5       | Rat27      | Rat33      |
|       | Y6     | Rat6       | Rat28      | Rat17      |
| Aged  | O1     | Rat21      | Rat7       | Rat18      |
|       | O2     | Rat29      | Rat8       | Rat19      |
|       | O3     | Rat30      | Rat20      | Rat36      |
|       | O4     | Rat35      | Rat9       | Rat31      |
|       | O5     | Rat22      | Rat10      | Rat34      |
|       | O6     | Rat32      | Rat11      | Rat23      |

Table S4: Proteins identified per sample

Table S4A. TIC abundances and proteins identified from striatum samples

| STR   | Date    | File name                         | TIC      | # proteins |
|-------|---------|-----------------------------------|----------|------------|
| Rat1  | 2282017 | 2017-02-24-RR-Rat-01-2            | 3.24E+09 | 890        |
| Rat2  | 2242017 | 2017-02-24-RR-STR-Rat02           | 3.86E+09 | 886        |
| Rat3  | 2242017 | 2017-02-24-RR-STR-Rat03           | 4.74E+09 | 990        |
| Rat4  | 2282017 | 2017-02-24-RR-STR-Rat04-2         | 2.31E+09 | 940        |
| Rat5  | 2242017 | 2017-02-24-RR-STR-Rat05           | 5.58E+09 | 977        |
| Rat6  | 2252017 | 2017-02-24-RR-STR-Rat06           | 4.72E+09 | 976        |
| Rat7  | 2252017 | 2017-02-24-RR-STR-Rat07           | 5.52E+09 | 940        |
| Rat8  | 2282017 | 2017-02-24-RR-STR-Rat08-2         | 5.45E+09 | 941        |
| Rat9  | 2252017 | 2017-02-24-RR-STR-Rat09           | 5.12E+09 | 1024       |
| Rat10 | 2252017 | 2017-02-24-RR-STR-Rat10           | 4.90E+09 | 994        |
| Rat11 | 2252017 | 2017-02-24-RR-STR-Rat11           | 5.27E+09 | 977        |
| Rat12 | 2282017 | 2017-02-24-RR-STR-Rat12-2         | 4.66E+09 | 911        |
| Rat13 | 2252017 | 2017-02-24-RR-STR-Rat13           | 4.44E+09 | 960        |
| Rat14 | 2252017 | 2017-02-24-RR-STR-Rat14           | 6.18E+09 | 1038       |
| Rat15 | 2252017 | 2017-02-24-RR-STR-Rat15           | 3.92E+09 | 1037       |
| Rat16 | 2252017 | 2017-02-24-RR-STR-Rat16           | 3.47E+09 | 989        |
| Rat17 | 2262017 | 2017-02-24-RR-STR-Rat17           | 5.08E+09 | 984        |
| Rat18 | 2262017 | 2017-02-24-RR-STR-Rat18           | 5.71E+09 | 979        |
| Rat19 |         | 2017-02-24-RR-STR-Rat19-corrupted |          |            |
| Rat20 | 2262017 | 2017-02-24-RR-STR-Rat20           | 4.36E+09 | 1024       |
| Rat21 | 2262017 | 2017-02-24-RR-STR-Rat21           | 3.94E+09 | 894        |
| Rat22 | 2262017 | 2017-02-24-RR-STR-Rat22           | 3.40E+09 | 968        |
| Rat23 | 2262017 | 2017-02-24-RR-STR-Rat23           | 3.54E+09 | 950        |
| Rat24 | 2262017 | 2017-02-24-RR-STR-Rat24           | 3.24E+09 | 880        |
| Rat25 | 2262017 | 2017-02-24-RR-STR-Rat25           | 3.25E+09 | 888        |
| Rat26 | 2272017 | 2017-02-24-RR-STR-Rat26           | 3.81E+09 | 983        |
| Rat27 | 2272017 | 2017-02-24-RR-STR-Rat27           | 4.60E+09 | 971        |
| Rat28 | 2272017 | 2017-02-24-RR-STR-Rat28           | 4.21E+09 | 953        |
| Rat29 | 2272017 | 2017-02-24-RR-STR-Rat29           | 3.76E+09 | 860        |
| Rat30 | 2272017 | 2017-02-24-RR-STR-Rat30           | 3.44E+09 | 1006       |
| Rat31 | 2272017 | 2017-02-24-RR-STR-Rat31           | 3.45E+09 | 917        |
| Rat32 |         | 2017-02-24-RR-STR-Rat32-corrupted |          |            |
| Rat33 | 2272017 | 2017-02-24-RR-STR-Rat33           | 5.39E+09 | 994        |
| Rat34 | 2272017 | 2017-02-24-RR-STR-Rat34           | 3.95E+09 | 966        |
| Rat35 | 2272017 | 2017-02-24-RR-STR-Rat35           | 4.01E+09 | 955        |
| Rat36 | 2282017 | 2017-02-24-RR-STR-Rat36           | 3.35E+09 | 989        |

Table S4B. TIC abundance and proteins identified from substantia nigra samples

| SN    | Date   | File name                             | TIC      | # proteins |
|-------|--------|---------------------------------------|----------|------------|
| Rat1  | 362017 | 2017-03-05-RR-SN-100fmol-Rat1         | 4.57E+09 | 929        |
| Rat2  | 362017 | 2017-03-05-RR-SN-100fmol-Rat2         | 3.69E+09 | 776        |
| Rat3  | 392017 | 2017-03-05-RR-SN-100fmol-Rat3         | 2.24E+09 | 794        |
| Rat4  | 342017 | 2017-03-05-RR-SN-100fmol-Rat4         | 3.59E+09 | 746        |
| Rat5  | 342017 | 2017-03-05-RR-SN-100fmol-Rat5         | 4.57E+09 | 1028       |
| Rat6  | 342017 | 2017-03-05-RR-SN-100fmol-Rat6         | 4.83E+09 | 1117       |
| Rat7  | 342017 | 2017-03-05-RR-SN-100fmol-Rat7         | 4.33E+09 | 1104       |
| Rat8  | 352017 | 2017-03-05-RR-SN-100fmol-Rat8         | 4.65E+09 | 1122       |
| Rat9  | 342017 | 2017-03-05-RR-SN-100fmol-Rat9         | 4.25E+09 | 1007       |
| Rat10 | 342017 | 2017-03-05-RR-SN-100fmol-Rat10        | 5.92E+09 | 1166       |
| Rat11 | 342017 | 2017-03-05-RR-SN-100fmol-Rat11        | 4.57E+09 | 1091       |
| Rat12 | 342017 | 2017-03-05-RR-SN-100fmol-Rat12        | 4.21E+09 | 1064       |
| Rat13 | 342017 | 2017-03-05-RR-SN-100fmol-Rat13        | 3.48E+09 | 923        |
| Rat14 | 342017 | 2017-03-05-RR-SN-100fmol-Rat14        | 3.99E+09 | 995        |
| Rat15 | 342017 | 2017-03-05-RR-SN-100fmol-Rat15        | 2.86E+09 | 768        |
| Rat16 | 352017 | 2017-03-05-RR-SN-100fmol-Rat16        | 3.78E+09 | 810        |
| Rat17 | 352017 | 2017-03-05-RR-SN-100fmol-Rat17        | 4.01E+09 | 1055       |
| Rat18 | 382017 | 2017-03-05-RR-SN-100fmol-Rat18        | 3.58E+09 | 1006       |
| Rat19 | 392017 | 2017-03-05-RR-SN-100fmol-Rat19        | 3.77E+09 | 977        |
| Rat20 | 392017 | 2017-03-05-RR-SN-100fmol-Rat20        | 4.45E+09 | 886        |
| Rat21 | 392017 | 2017-03-05-RR-SN-100fmol-Rat21        | 4.64E+09 | 1053       |
| Rat22 | 392017 | 03062017-RR-SN-100fmol-Rat22-r        | 5.34E+09 | 1067       |
| Rat23 | 362017 | 2017-03-05-RR-SN-100fmol-Rat23        | 4.38E+09 | 1046       |
| Rat24 | 362017 | 2017-03-05-RR-SN-100fmol-Rat24        | 3.45E+09 | 1041       |
| Rat25 | 382017 | 2017-03-05-RR-SN-100fmol-Rat25        | 2.71E+09 | 858        |
| Rat26 | 372017 | 03062017-RR-SN-Rat26-<br>170307144122 | 4.22E+09 | 1044       |
| Rat27 | 372017 | 2017-03-05-RR-SN-100fmol-Rat27        | 4.72E+09 | 1108       |
| Rat28 | 372017 | 2017-03-05-RR-SN-100fmol-Rat28        | 4.46E+09 | 1128       |
| Rat29 | 392017 | 2017-03-05-RR-SN-100fmol-Rat29        | 3.15E+09 | 987        |
| Rat30 | 392017 | 2017-03-05-RR-SN-100fmol-Rat30        | 4.37E+09 | 991        |
| Rat31 | 382017 | 2017-03-05-RR-SN-100fmol-Rat31        | 3.12E+09 | 936        |
| Rat32 | 382017 | 2017-03-05-RR-SN-100fmol-Rat32        | 5.65E+09 | 1075       |
| Rat33 | 382017 | 2017-03-05-RR-SN-100fmol-Rat33        | 4.82E+09 | 1103       |
| Rat34 | 382017 | 2017-03-05-RR-SN-100fmol-Rat34        | 4.91E+09 | 1087       |
| Rat35 | 382017 | 2017-03-05-RR-SN-100fmol-Rat35        | 3.89E+09 | 905        |
| Rat36 | 382017 | 2017-03-05-RR-SN-100fmol-Rat36        | 4.34E+09 | 970        |
